# Supplementary material
Source: publisher figshare collection journal article supplement (https://frontiersin.figshare.com/ndownloader/files/11490023)
Supplement: Supplementary file [file 11490023]

**Supplemental table 1**

The Jaccard index was calculated by assessing the number of TCR $\beta$  clonotypes that were shared between every two TCZ of one group and dividing these number by the total number of TCR $\beta$  clonotypes occurring in either of the two TCZ. Corresponding data and statistics are shown in Figure 3A.

| sample1      | sample2      | wt/naive | wt/SRBC | cd154ko/naive | cd154ko/SRBC |
|--------------|--------------|----------|---------|---------------|--------------|
|              |              |          |         |               |              |
| TCZ1 mouse 1 | TCZ1 mouse 2 | 0.087    | 0.071   | 0.046         | 0.072        |
| TCZ1 mouse 1 | TCZ2 mouse 2 | 0.086    | 0.076   | 0.050         | 0.079        |
| TCZ1 mouse 1 | TCZ1 mouse 3 | 0.074    | 0.081   | 0.053         | 0.071        |
| TCZ1 mouse 1 | TCZ2 mouse 3 | 0.056    | 0.074   | 0.052         | 0.051        |
| TCZ2 mouse 1 | TCZ1 mouse 2 | 0.066    | 0.070   | 0.050         | 0.056        |
| TCZ2 mouse 1 | TCZ2 mouse 2 | 0.066    | 0.073   | 0.060         | 0.053        |
| TCZ2 mouse 1 | TCZ1 mouse 3 | 0.064    | 0.075   | 0.060         | 0.056        |
| TCZ2 mouse 1 | TCZ2 mouse 3 | 0.054    | 0.072   | 0.059         | 0.050        |
|              |              |          |         |               |              |
| TCZ1 mouse 2 | TCZ1 mouse 3 | 0.073    | 0.066   | 0.048         | 0.071        |
| TCZ1 mouse 2 | TCZ2 mouse 3 | 0.058    | 0.068   | 0.048         | 0.052        |
|              |              |          |         |               |              |
| TCZ2 mouse 2 | TCZ1 mouse 3 | 0.072    | 0.078   | 0.067         | 0.074        |
| TCZ2 mouse 2 | TCZ2 mouse 3 | 0.057    | 0.074   | 0.065         | 0.050        |
